# Supplementary material for: Management of Children Admitted to Hospitals across Bangladesh with Suspected or Confirmed COVID-19 and the Implications for the Future: A Nationwide Cross-Sectional Study
Source: MDPI journal article supplement (doi:10.3390/antibiotics11010105), 2022-01-14
Supplement: s1 [file s1]

## Supplementary Materials

### File S1. Bangladesh: COVID-19 Pediatric Case Management

Pediatrician Name:

Date of the survey:

Name of the hospital:

E-mail:

Orcid Id:

|                                                                                                                     |             | Admitted in Ward                                                                                                                                                                                                                      | Admitted in PICU                                                                                                                                                                                                                                              |
|---------------------------------------------------------------------------------------------------------------------|-------------|---------------------------------------------------------------------------------------------------------------------------------------------------------------------------------------------------------------------------------------|---------------------------------------------------------------------------------------------------------------------------------------------------------------------------------------------------------------------------------------------------------------|
| Total patients in the children's ward including up to the previous 10 days                                          |             |                                                                                                                                                                                                                                       |                                                                                                                                                                                                                                                               |
| Number and % of patients in the children's ward with COVID-19                                                       |             |                                                                                                                                                                                                                                       |                                                                                                                                                                                                                                                               |
| Primary reasons for admission of children with diagnosed/ suspected COVID-19 to the hospital (Tick/ Circle up to 3) |             | <ul style="list-style-type: none"> <li>• Prolonged Fever.</li> <li>• Breathing Difficulty/ Respiratory Distress.</li> <li>• Cough.</li> <li>• Diarrhea.</li> <li>• Feeding Difficulty/Vomiting.</li> <li>• Others- Specify</li> </ul> |                                                                                                                                                                                                                                                               |
| Number of children admitted to PICU with covid-19 during the study period                                           |             |                                                                                                                                                                                                                                       |                                                                                                                                                                                                                                                               |
| Primary reasons for admission to the PICU with diagnosed COVID-19 (Tick/ Circle up to 3)                            |             |                                                                                                                                                                                                                                       | <ul style="list-style-type: none"> <li>• Severe respiratory distress/ Low oxygen saturation</li> <li>• Shock</li> <li>• Coagulation disorder/ Thromboembolic manifestation</li> <li>• Extensive lung involvement in HRCT</li> <li>• Co-morbidities</li> </ul> |
| Age of patients with COVID-19                                                                                       | 0-5 years   |                                                                                                                                                                                                                                       |                                                                                                                                                                                                                                                               |
|                                                                                                                     | 6-10 years  |                                                                                                                                                                                                                                       |                                                                                                                                                                                                                                                               |
|                                                                                                                     | 11-18 years |                                                                                                                                                                                                                                       |                                                                                                                                                                                                                                                               |
| Patients' Sex (Mention total number)                                                                                | Male        |                                                                                                                                                                                                                                       |                                                                                                                                                                                                                                                               |
|                                                                                                                     | Female      |                                                                                                                                                                                                                                       |                                                                                                                                                                                                                                                               |

|                                                                                                                                           |                                                                 |                                                               |  |
|-------------------------------------------------------------------------------------------------------------------------------------------|-----------------------------------------------------------------|---------------------------------------------------------------|--|
| Underlying conditions and co-morbidities (mention up to top 3 for admitted patients)                                                      |                                                                 |                                                               |  |
| Does Your Hospital Have a Specific Policy/ guideline to Manage pediatric patients based on the Pediatric Association Guidelines – Yes/ No |                                                                 |                                                               |  |
| If antibiotics prescribed, total number and % of patients receiving an antibiotic                                                         |                                                                 |                                                               |  |
| Antibiotics prescribed                                                                                                                    | Based on Culture Sensitivity Test (CST) findings (Number and %) |                                                               |  |
|                                                                                                                                           | Empirically (Number and %)                                      |                                                               |  |
| Name of Antimicrobials & Other prescribed Medicine + ATC code                                                                             | Antibiotics (Tick/ Circle top 3)                                | Total number of children with COVID 19 prescribed antibiotics |  |
|                                                                                                                                           |                                                                 | Aminoglycoside                                                |  |
|                                                                                                                                           |                                                                 | Carbapenems                                                   |  |
|                                                                                                                                           |                                                                 | Cephalosporins                                                |  |
|                                                                                                                                           |                                                                 | Macrolide                                                     |  |
|                                                                                                                                           |                                                                 | Penicillin                                                    |  |
|                                                                                                                                           |                                                                 | Quinolones                                                    |  |
|                                                                                                                                           |                                                                 | Tetracycline                                                  |  |
|                                                                                                                                           |                                                                 | Others (please specify)                                       |  |
|                                                                                                                                           | Antimalarial                                                    | Number of children with COVID 19 prescribed antimalarials     |  |
|                                                                                                                                           |                                                                 | Hydroxychloroquine                                            |  |
|                                                                                                                                           |                                                                 | Others                                                        |  |
|                                                                                                                                           | Antiviral (Number and % of patients)                            | Number of children with COVID 19 prescribed antivirals        |  |
|                                                                                                                                           |                                                                 | Remdesivir                                                    |  |
|                                                                                                                                           |                                                                 | Others (please specify)                                       |  |

|  |                                                        |                                                                     |  |
|--|--------------------------------------------------------|---------------------------------------------------------------------|--|
|  | Antiparasitic<br>(Number and %<br>of patients)         | Number of children<br>with COVID 19<br>prescribed<br>antiparasitics |  |
|  |                                                        | Ivermectin                                                          |  |
|  |                                                        | Others (please<br>specify)                                          |  |
|  | Anti-<br>inflammatory<br>(Number and %<br>of patients) | Dexamethasone                                                       |  |
|  |                                                        | Methylprednisolone                                                  |  |
|  |                                                        | Tocilizumab                                                         |  |
|  |                                                        | Others (please<br>specify)                                          |  |
|  | Supplementary                                          | Vit C                                                               |  |
|  |                                                        | Vit D                                                               |  |
|  |                                                        | Zinc                                                                |  |

|                                                                       |                                |  |
|-----------------------------------------------------------------------|--------------------------------|--|
| Formulation of<br>Antimicrobials                                      | Oral (Number and %)            |  |
|                                                                       | Parenteral (IV) (Number and %) |  |
| Average duration of<br>Prescribed Antimicrobials                      |                                |  |
| After prescribing antibiotics,<br>clinically reassessed or not        | Yes (After How Many days)      |  |
|                                                                       | No                             |  |
| Recovery rate during study<br>period                                  | Mortality (number and %)       |  |
|                                                                       | Morbidity (Number and %)       |  |
|                                                                       | Full recovery (Number and %)   |  |
| Duration of Hospital stay                                             |                                |  |
| Total Expense (In Average<br>Bangladeshi Taka – Private<br>hospitals) |                                |  |
|                                                                       | Private Hospital               |  |

- If any patient is referred to PICU of other hospital, please mention the cause of referral such as low oxygen saturation or others.
